# Supplementary material for: A novel strategy using peroxymonosulfate to control the formation of iodinated aromatic products in treatment of phenolic compounds by permanganate
Source: Royal Society of Chemistry journal article supplement (doi:10.1039/c9ew00321e), 2019-01-01
Supplement: c9ew00321e1.pdf [file c9ew00321e1.pdf]

## Supporting Information for

# A Novel Strategy Using Peroxymonosulfate to Control the Formation of Iodinated Aromatic Products in Treatment of Phenolic Compounds by Permanganate

Juan Li <sup>a</sup>, Jin Jiang <sup>a, b \*</sup>, Su-Yan Pang <sup>c</sup>, Shaofang Sun <sup>d</sup>, Lihong Wang <sup>a</sup>,

Yang Zhou <sup>b</sup>, Zhen Wang <sup>a</sup>, and Yuan Gao <sup>b</sup>

<sup>a</sup> State Key Laboratory of Urban Water Resource and Environment, School of  
Environment, Harbin Institute of Technology, Harbin 150090, China

<sup>b</sup> Institute of Environmental and Ecological Engineering, Guangdong University of  
Technology, Guangzhou 510006, China

<sup>c</sup> Key Laboratory of Songliao Aquatic Environment, Ministry of Education, School  
of Municipal and Environmental Engineering, Jilin Jianzhu University, Changchun  
130118, China

<sup>d</sup> School of Civil Engineering and Architecture, University of Jinan, Jinan 250022,  
China

\*Corresponding authors contact details: Prof. Jin Jiang

E-mail: [jiangjinhit@126.com](mailto:jiangjinhit@126.com); [jiangjin@gdut.edu.cn](mailto:jiangjin@gdut.edu.cn)

## **Text S1. Description of the principle of the Precursor Ion Scan (PIS) and Multiple Reaction Monitoring (MRM) approach**

The PIS approach has been developed by Zhang et al. [1-3] as an effective tool to selectively pick out polar halogen-containing compounds that are ionizable in negative ESI and its principle has been well elaborated by these authors. There are three quadrupoles of the mass spectrometer called  $Q_1$ ,  $Q_2$  and  $Q_3$ . The compounds in the samples would be firstly ionized by the electrospray ionization producing corresponding molecular ions. These ions then passed  $Q_1$  in sequence with their  $m/z$  values scanned. As these ions entered collide chamber ( $Q_2$ ) and collided with argon gas, fragment ions were then produced. By setting PIS of  $m/z$  127 as conducted in this work,  $Q_3$  would only selectively detect fragment iodide ion ( $m/z$  of 127) that generated in  $Q_2$ . In this way, polar iodide-containing compounds could be quickly and selectively picked out. For MRM measurement, the combination of molecular ion and the iodide ion was used as the precursor/product ion pairs due to their high intensity.

## References

- [1] Zhang X., Talley J. W., Boggess B., Ding G., Birdsell D., Fast selective detection of polar brominated disinfection byproducts in drinking water using precursor ion scans, *Environ. Sci. Technol.*, 2008, 42, 6598-6603.
- [2] Gong T., Zhang X., Detection, identification, and formation of new iodinated disinfection byproducts in chlorinated saline wastewater effluents, *Water Res.*, 2015, 68, 77-86.
- [3] Ding G., Zhang X., A picture of polar iodinated disinfection byproducts in drinking water by (UPLC/)ESI-tqMS, *Environ. Sci. Technol.* 2009, 43, 9287-9293.
